# Supplementary material for: Identification of Loci Associated with Enhanced Virulence in Spodoptera litura Nucleopolyhedrovirus Isolates Using Deep Sequencing
Source: MDPI journal article supplement (doi:10.3390/v11090872), 2019-09-17
Supplement: s1 [file s1]

Dataset 3: Manual curation of within-isolate polymorphisms. Position is the nucleotide position in the corresponding de novo consensus sequence, length is size of the mutation, freq. is the frequency of the mutation (count/coverage), F./R. is the ratio of reads mapping in the forward to reverse orientations, avg. score is the average Phred score, and manual curation gives the results of inspections of the read mappings.

| Virus | Position | Class     | Length | Reference       | New | Count | Coverage | Freq.  | F./R. | Avg. Score | Manual curation                 |
|-------|----------|-----------|--------|-----------------|-----|-------|----------|--------|-------|------------|---------------------------------|
| BNG   | 10396    | Deletion  | 1      | T               | -   | 221   | 3915     | 5.645  | 0.457 | 36.742     | Artefact repeated T stretch     |
|       | 10396    | Insertion | 1      | -               | T   | 135   | 3867     | 3.491  | 0.431 | 37.733     | Artefact repeated T stretch     |
|       | 14399    | Insertion | 1      | -               | T   | 1277  | 3392     | 37.647 | 0.487 | 37.288     | Artefact repeated T stretch     |
|       | 14399    | Deletion  | 1      | T               | -   | 84    | 3503     | 2.398  | 0.447 | 36.702     | Artefact repeated T stretch     |
|       | 29118    | Deletion  | 1      | A               | -   | 106   | 3447     | 3.075  | 0.433 | 36.434     | Artefact repeated A stretch     |
|       | 35000    | SNV       | 1      | C               | A   | 155   | 3881     | 3.994  | 0.442 | 37.465     | Authentic                       |
|       | 35202    | SNV       | 1      | C               | T   | 1623  | 3455     | 46.975 | 0.500 | 37.212     | Authentic                       |
|       | 40062    | Deletion  | 1      | A               | -   | 173   | 2940     | 5.884  | 0.383 | 36.457     | Artefact repeated A stretch     |
|       | 41180    | SNV       | 1      | G               | A   | 60    | 2910     | 2.062  | 0.478 | 36.967     | Authentic                       |
|       | 45843    | Deletion  | 3      | TAG             | -   | 92    | 3669     | 2.507  | 0.472 | 36.935     | Artefact repeated T stretch     |
|       | 54562    | Insertion | 1      | -               | A   | 792   | 3571     | 22.179 | 0.492 | 37.556     | Artefact repeated A stretch     |
|       | 54562    | Deletion  | 1      | A               | -   | 123   | 3818     | 3.222  | 0.485 | 36.333     | Artefact repeated A stretch     |
|       | 68688    | Deletion  | 2      | AC              | -   | 168   | 3577     | 4.697  | 0.451 | 37.015     | Artefact repeat region          |
|       | 94442    | Deletion  | 1      | T               | -   | 245   | 4343     | 5.641  | 0.436 | 36.878     | Artefact repeated T stretch     |
|       | 97803    | SNV       | 1      | C               | T   | 217   | 3219     | 6.741  | 0.271 | 37.230     | Artefact repeat region          |
|       | 97957    | Deletion  | 3      | TCG             | -   | 364   | 1382     | 26.339 | 0.403 | 37.357     | Artefact repeat region          |
|       | 97961    | Deletion  | 14     | CCACGTTTCGATCAT | -   | 382   | 1354     | 28.213 | 0.413 | 37.370     | Artefact repeat region          |
|       | 97977    | SNV       | 1      | A               | C   | 562   | 2375     | 23.663 | 0.379 | 37.527     | Artefact repeat region          |
|       | 97977    | Deletion  | 2      | AT              | -   | 341   | 2427     | 14.050 | 0.482 | 37.388     | Artefact repeat region          |
|       | 97978    | Deletion  | 1      | T               | -   | 1505  | 2427     | 62.011 | 0.387 | 36.747     | Artefact repeat region          |
|       | 97979    | SNV       | 1      | A               | T   | 558   | 2467     | 22.619 | 0.376 | 37.427     | Artefact repeat region          |
|       | 104686   | Insertion | 1      | -               | A   | 133   | 4810     | 2.765  | 0.477 | 37.534     | Artefact repeated A stretch     |
|       | 110733   | Deletion  | 1      | T               | -   | 313   | 4491     | 6.969  | 0.427 | 36.572     | Artefact repeated T stretch     |
|       | 110733   | Insertion | 1      | -               | T   | 98    | 4461     | 2.197  | 0.415 | 37.153     | Artefact repeated T stretch     |
|       | 111904   | SNV       | 1      | C               | T   | 407   | 3822     | 10.649 | 0.493 | 37.314     | Authentic                       |
|       | 112846   | Insertion | 1      | -               | T   | 230   | 3989     | 5.766  | 0.434 | 37.626     | Artefact repeated T stretch     |
|       | 112846   | Deletion  | 1      | T               | -   | 105   | 4049     | 2.593  | 0.458 | 36.724     | Artefact repeat region          |
|       | 116029   | Deletion  | 3      | GAT             | -   | 89    | 4360     | 2.041  | 0.439 | 36.647     | Artefact repeated GAT sequence  |
| TAX1  | 3227     | Deletion  | 2      | GT              | -   | 386   | 4894     | 7.887  | 0.471 | 35.933     | Artefact repeated region        |
|       | 10393    | Insertion | 1      | -               | T   | 110   | 4637     | 2.372  | 0.459 | 37.436     | Artefact repeated T stretch     |
|       | 16680    | Deletion  | 2      | TA              | -   | 451   | 4992     | 9.034  | 0.453 | 36.230     | Artefact repeated region        |
|       | 16680    | Insertion | 2      | -               | TA  | 263   | 4463     | 5.893  | 0.389 | 37.736     | Artefact repeated region        |
|       | 16680    | Deletion  | 4      | TATA            | -   | 109   | 5245     | 2.078  | 0.393 | 36.770     | Artefact repeated region        |
|       | 26850    | Deletion  | 1      | T               | -   | 238   | 5251     | 4.532  | 0.476 | 36.882     | Artefact repeated T stretch     |
|       | 26850    | Insertion | 1      | -               | T   | 106   | 5185     | 2.044  | 0.482 | 37.585     | Artefact repeated T stretch     |
|       | 29143    | Deletion  | 1      | A               | -   | 151   | 4594     | 3.287  | 0.381 | 36.728     | Artefact repeated A stretch     |
|       | 45848    | Deletion  | 3      | TAG             | -   | 153   | 5202     | 2.941  | 0.434 | 37.013     | Artefact related to TAG repeats |
|       | 55296    | Deletion  | 1      | A               | -   | 161   | 4978     | 3.234  | 0.495 | 37.366     | Artefact repeated region        |
|       | 68638    | Deletion  | 2      | AC              | -   | 200   | 3684     | 5.429  | 0.424 | 36.700     | Artefact repeated region        |
|       | 91564    | Deletion  | 3      | GAC             | -   | 89    | 4095     | 2.173  | 0.418 | 36.921     | Artefact repeated region        |
|       | 94483    | Deletion  | 1      | T               | -   | 298   | 5559     | 5.361  | 0.422 | 36.990     | Artefact repeated T stretch     |
|       | 94483    | Insertion | 1      | -               | T   | 117   | 5491     | 2.131  | 0.452 | 37.179     | Artefact repeated T stretch     |
|       | 97943    | Insertion | 1      | -               | A   | 513   | 544      | 94.301 | 0.499 | 36.690     | Artefact repeated region.       |
|       | 97943    | Insertion | 1      | -               | C   | 27    | 544      | 4.963  | 0.444 | 37.333     | Artefact repeated region        |
|       | 97944    | SNV       | 1      | T               | G   | 540   | 544      | 99.265 | 0.494 | 36.157     | Artefact repeated region.       |
|       | 98204    | SNV       | 1      | C               | A   | 416   | 2995     | 13.890 | 0.436 | 35.007     | Authentic                       |
|       | 113154   | Insertion | 1      | -               | T   | 1961  | 5016     | 39.095 | 0.436 | 37.303     | Artefact repeated T stretch     |
|       | 115768   | Deletion  | 3      | TAC             | -   | 166   | 6201     | 2.677  | 0.476 | 37.404     | Artefact related to TAC repeats |
|       | 119268   | Deletion  | 2      | CA              | -   | 177   | 5444     | 3.251  | 0.492 | 36.836     | Artefact repeated region        |
|       | 120114   | Deletion  | 1      | T               | -   | 177   | 6079     | 2.912  | 0.477 | 37.249     | Artefact repeated T stretch     |
