# Supplementary material for: Identification of Loci Associated with Enhanced Virulence in Spodoptera litura Nucleopolyhedrovirus Isolates Using Deep Sequencing
Source: MDPI journal article supplement (doi:10.3390/v11090872), 2019-09-17
Supplement: s1 [file s1]

**(a)**

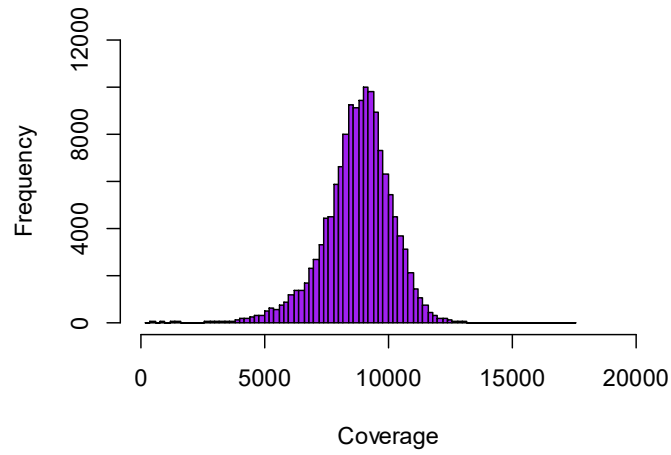

**(b)**

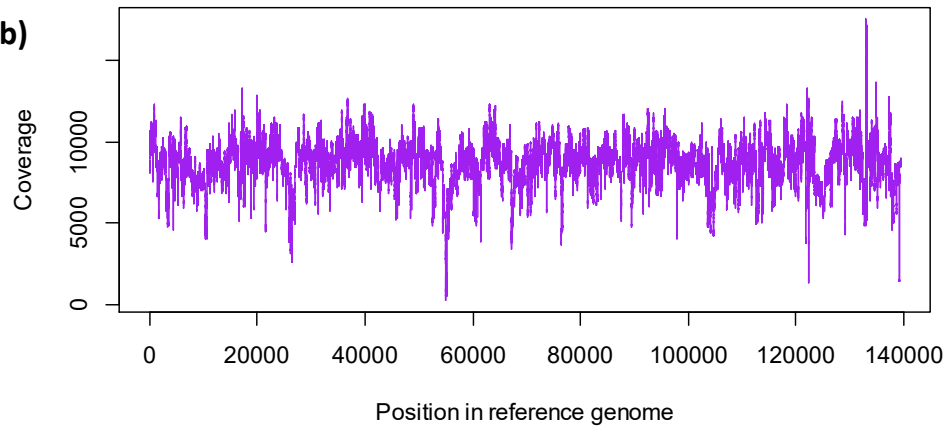

**Figure S1.** Coverage resulting from the mapping of SpltNPV-G2b to the SpltNPV-G2 reference sequence is shown. **(a)** A histogram of coverage per nucleotide is given. **(b)** The coverage per position in the SpltNPV-G2 reference is shown.

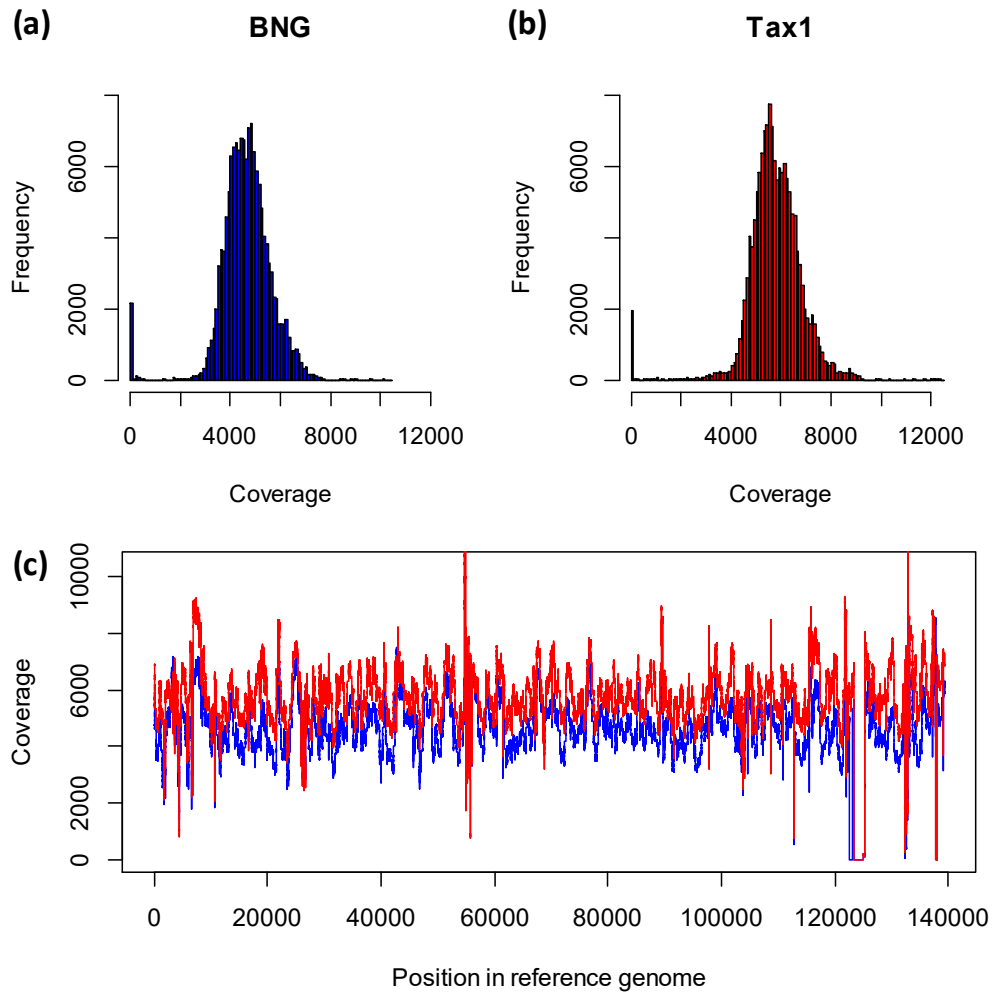

**Figure S2.** (a) The coverage per nucleotide position for the resequencing analysis is shown in histograms for isolate SpltNPV-Pak-BNG. (b) The coverage for SpltNPV-Pak-TAX1 is given. Note the similarity of the distributions for SpltNPV-Pak-BNG and SpltNPV-Pak-TAX1, and that approximately 2000 positions have little or no coverage. (c) The coverage per position in the SpltNPV-G2 reference is shown in blue for SpltNPV-Pak-BNG and in red for SpltNPV-Pak-TAX1. Note the two regions in which there is no coverage.

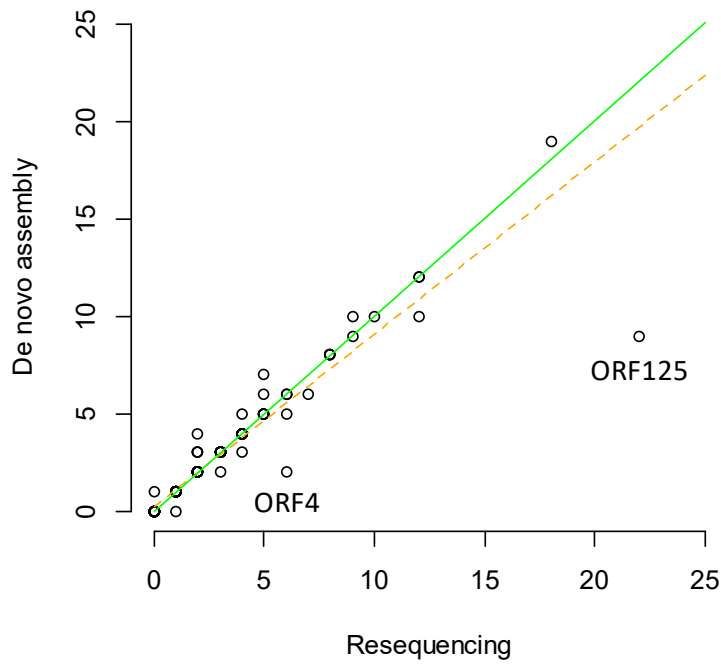

**Figure S3.** The total number of unique synonymous and nonsynonymous mutations per ORF (i.e., the sum of unique mutations in SpltNPV-Pak-BNG and SpltNPV-Pak-TAX1 when analyzed by resequencing, or all mutations identified in the de novo assembly approach) is plotted for the resequencing (x-axis) and de novo assembly (y-axis) approaches. The dotted orange line is the model 2 regression line using all data, whilst the green line is the model 2 regression line excluding ORF125 (data point labelled), which appears to be an outlier. For all data, the slope of the regression line is 0.833, whereas without ORF125 the slope is 1.004. With the exception of ORF4 and ORF125, there seems to be very good agreement between the two deep sequencing analysis methods.

**Table S1.** Predicted and observed restriction fragment length polymorphism band lengths, with predictions based on the de novo assembled sequences. All band lengths are in base pairs. ND indicates “not distinguished” for the empirical data, suggesting that a band is likely present but could not be positively identified because its length is similar to another band.

| <b>BNG S9 de novo</b> |                   | <b>TAX1 S10 de novo</b> |                   |
|-----------------------|-------------------|-------------------------|-------------------|
| <b>Predicted</b>      | <b>Observed</b>   | <b>Predicted</b>        | <b>Observed</b>   |
| 16028                 | 15000             | 16021                   | 15000             |
| 11420                 | 10500             | 11386                   | 10500             |
| 10496                 | ND                | 10480                   | 10000             |
| 10220                 | 10000             | 10217                   | ND                |
| 9386                  | 9000              | 9393                    | 8250              |
| 7918                  | 8000              | 7765                    | 8000              |
| 7458                  | 7500              | 7458                    | 7500              |
| 6779                  | 6500              | 6795                    | 6500              |
| 5533                  | 5250              | 5675                    | 5500              |
| 5389                  | ND                | 5250                    | 5250              |
| 5250                  | ND                | 5078                    | 5000              |
| 5010                  | 4900              | 5058                    | ND                |
| 4621                  | 4750              | 4617                    | 4500              |
| 4613                  | 4500              | 4614                    | ND                |
| 4493                  | 4250              | 4421                    | 4250              |
| 2612                  | 2500              | 2612                    | 2500              |
| 2423                  | 2300              | 2423                    | 2300              |
| 2370                  | 2250              | 2370                    | ND                |
| 2266                  | 2100              | 2260                    | 2250              |
| 2186                  | 2000              | 2198                    | 2100              |
| 1941                  | 1750              | 1938                    | 2000              |
| 1886                  | 1600              | 1886                    | 1750              |
| 1357                  | 1300              | 1663                    | 1600              |
| 1171                  | 1200              | 1357                    | 1300              |
| 1062                  | 1100              | 1062                    | 1200              |
| 1061                  | ND                | 1061                    | 1100              |
| 976                   | No longer visible | 976                     | No longer visible |
| 351                   |                   | 391                     |                   |
| 243                   |                   | 351                     |                   |
| 222                   |                   | 243                     |                   |
| 218                   |                   | 222                     |                   |
| 196                   |                   | 218                     |                   |
|                       |                   | 196                     |                   |
